# Supplementary material
Source: Elsevier journal article supplement (https://www.sciencedirect.com/science/article/pii/S1889183718300771)
Supplement: mmc1 [file S1889183718300771:mmc1.pdf]

**Tabla I. Cuestionario y variables del área de evaluación 1: Sistemas de información**

| Pregunta                                                                                                                                                                                                                                                                                              | Tipo de variable y posibles respuestas | Respuesta control |
|-------------------------------------------------------------------------------------------------------------------------------------------------------------------------------------------------------------------------------------------------------------------------------------------------------|----------------------------------------|-------------------|
| 1. ¿Se dispone de historia clínica compartida entre AP y AE? (Entendido como un modelo que posibilita el uso compartido de las historias clínicas entre los centros asistenciales, consiguiendo que todos los agentes implicados tengan participación y acceso a toda la información clínica posible) | Cualitativa<br>Sí/ No                  | Sí <sup>a</sup>   |
| 1a. En caso de que la respuesta 1 sea negativa, ¿se dispone de un visor donde consultar información compartida, aunque sea parcial, de la historia clínica?                                                                                                                                           | Cualitativa<br>Sí/ No                  | Sí <sup>a</sup>   |
| 2. ¿Se pueden disponer/consultar en AP los datos analíticos obtenidos en AE?                                                                                                                                                                                                                          | Cualitativa<br>Sí/ No                  | Sí <sup>a</sup>   |
| 3. ¿Se dispone de un sistema de alertas para las interacciones (seguimiento de pacientes crónicos polimedcados)?                                                                                                                                                                                      | Cualitativa<br>Sí/ No                  | Sí <sup>a</sup>   |
| <b>¿Se utilizan las TIC de forma habitual?<br/>Comunicación entre profesionales</b>                                                                                                                                                                                                                   |                                        |                   |
| 4. ¿Se dispone de TIC para la comunicación entre AE y AP?                                                                                                                                                                                                                                             | Cualitativa<br>Sí/ No                  | Sí <sup>a</sup>   |
| 5. ¿Se dispone de la historia clínica compartida entre niveles, una web corporativa u otros elementos?                                                                                                                                                                                                | Cualitativa<br>Sí/ No                  | Sí <sup>a</sup>   |
| 6. ¿Se dispone de elementos para la toma de decisiones diagnósticas y/o terapéuticas entre niveles?                                                                                                                                                                                                   | Cualitativa<br>Sí/ No                  | Sí <sup>a</sup>   |
| <b>Comunicación entre profesionales y pacientes</b>                                                                                                                                                                                                                                                   |                                        |                   |
| 7. ¿Se dispone de plataformas para la comunicación entre profesionales sanitarios y pacientes?                                                                                                                                                                                                        | Cualitativa<br>Sí/ No                  | Sí <sup>a</sup>   |

<sup>a</sup> Consenso del Comité de Expertos EFIGIE-HTA.

AP: atención primaria. AE: atención especializada. TIC: Tecnologías de la información y la comunicación.

**Tabla II. Cuestionario y variables del área de evaluación 2: Pruebas diagnósticas y analíticas**

| Pregunta                                                                                                                                                                 | Tipo de variable y respuesta                                                                                                                         | Respuesta control                                                                                     |
|--------------------------------------------------------------------------------------------------------------------------------------------------------------------------|------------------------------------------------------------------------------------------------------------------------------------------------------|-------------------------------------------------------------------------------------------------------|
| 1. ¿Se sigue algún programa de atención preventiva (medir la PA en todos los casos que acuden por otras causas) para incrementar el número de diagnósticos precoces?     | Cualitativa<br>Sí/ No                                                                                                                                | Sí <sup>b</sup>                                                                                       |
| 1a. En caso de respuesta 1 afirmativa:<br>• ¿Toma la PA en la misma consulta?<br>• ¿Cita de nuevo al paciente en la consulta de enfermería?<br>• Otros: indique cuáles   | Cualitativa<br>Elección:<br>• Toma la PA en la misma consulta<br>• Cita de nuevo al paciente en la consulta de enfermería<br>• Otros: indique cuáles | Toma la PA en la misma consulta / Cita de nuevo al paciente en la consulta de enfermería <sup>c</sup> |
| 2. ¿Dispone de la posibilidad de utilizar la MAPA para el diagnóstico y/o manejo de la HTA en su centro o con fácil acceso?                                              | Cualitativa<br>Sí/ No                                                                                                                                | Sí <sup>c, d</sup>                                                                                    |
| 2a. En caso de respuesta 2 afirmativa:<br>¿Cuántos registros de MAPA se utilizaron de media en los últimos 12 meses?                                                     | Cuantitativa <sup>a</sup><br>Número                                                                                                                  | No aplica                                                                                             |
| 2b. En caso de respuesta 2 afirmativa:<br>¿Cuántos pacientes se controlaron mediante MAPA en los últimos 12 meses?                                                       | Cualitativa <sup>a</sup><br>Elección:<br>≤25%, 26-50%, 51-75%, >75%                                                                                  | 26-50% <sup>c</sup>                                                                                   |
| 3. ¿Se realiza una batería de preguntas para identificar sustancias (no farmacológicas y farmacológicas) que modifican la presión arterial?                              | Cualitativa<br>Sí/ No                                                                                                                                | Sí <sup>b</sup>                                                                                       |
| 4. ¿Se piden parámetros de función y daño renal en el estudio de la PA?                                                                                                  | Cualitativa<br>Sí/ No                                                                                                                                | Sí <sup>b, e, f</sup>                                                                                 |
| <b>¿Se realizan sistemáticamente en AP las siguientes pruebas complementarias en el paciente con HTA controlada sin otros factores de riesgo ni enfermedad vascular?</b> |                                                                                                                                                      |                                                                                                       |
| 5. ¿Se realiza sistemáticamente una exploración del fondo de ojo?                                                                                                        | Cualitativa<br>Sí/ No                                                                                                                                | No <sup>g</sup>                                                                                       |
| 5a. En caso de respuesta 5 afirmativa; ¿con qué frecuencia se solicita?                                                                                                  | Cualitativa <sup>a</sup><br>Elección:<br>Cada 6 meses, cada 12 meses, cada más de 12 meses                                                           | Cada más de 12 meses <sup>b, g</sup>                                                                  |
| 6. ¿Se realiza sistemáticamente un electrocardiograma?                                                                                                                   | Cualitativa<br>Sí/ No                                                                                                                                | Sí <sup>g</sup>                                                                                       |
| 6a. En caso de respuesta 6 afirmativa, ¿con qué frecuencia se solicita?                                                                                                  | Cualitativa <sup>a</sup><br>Elección:<br>Cada 6 meses, cada 12 meses, cada más de 12 meses                                                           | Cada más de 12 meses <sup>g</sup>                                                                     |
| 7. ¿Se realiza sistemáticamente un análisis de iones?                                                                                                                    | Cualitativa<br>Sí/ No                                                                                                                                | Sí <sup>b</sup>                                                                                       |
| 7a. En caso de respuesta afirmativa, ¿con qué frecuencia se solicita?                                                                                                    | Cualitativa <sup>a</sup><br>Elección:<br>Cada 6 meses, cada 12 meses, cada más de 12 meses                                                           | Cada 12 meses <sup>g</sup>                                                                            |
| 8. ¿Se realiza sistemáticamente un análisis de creatinina?                                                                                                               | Cualitativa<br>Sí/ No                                                                                                                                | Sí <sup>b</sup>                                                                                       |
| 8a. En caso de respuesta 8 afirmativa, ¿con qué frecuencia se solicita?                                                                                                  | Cualitativa <sup>a</sup><br>Elección:<br>Cada 6 meses, cada 12 meses, cada más de 12 meses                                                           | Cada 12 meses <sup>g</sup>                                                                            |
| 9. ¿Se realiza el índice albúmina/creatinina sistemáticamente?                                                                                                           | Cualitativa<br>Sí/ No                                                                                                                                | Sí <sup>b</sup>                                                                                       |

|                                                                                                                             |                                                                                                                                                                                        |                            |
|-----------------------------------------------------------------------------------------------------------------------------|----------------------------------------------------------------------------------------------------------------------------------------------------------------------------------------|----------------------------|
| 9a. En caso de respuesta 9 afirmativa, ¿con qué frecuencia se solicita?                                                     | Cualitativa <sup>a</sup><br>Elección:<br>Cada 6 meses, cada 12 meses,<br>cada más de 12 meses                                                                                          | Cada 12 meses <sup>g</sup> |
| 10. ¿Se realiza sistemáticamente un análisis de la glucemia?                                                                | Cualitativa<br>Sí/ No                                                                                                                                                                  | Sí <sup>b</sup>            |
| 10a. En caso de respuesta afirmativa, ¿con qué frecuencia se solicita?                                                      | Cualitativa <sup>a</sup><br>Elección:<br>Cada 6 meses, cada 12 meses,<br>cada más de 12 meses                                                                                          | Cada 12 meses <sup>g</sup> |
| 11. ¿Se realiza sistemáticamente un análisis del perfil lipídico?                                                           | Cualitativa<br>Sí/ No                                                                                                                                                                  | Sí <sup>b</sup>            |
| 11a. En caso de respuesta afirmativa; ¿con qué frecuencia se solicita?                                                      | Cualitativa <sup>a</sup><br>Elección:<br>Cada 6 meses, cada 12 meses,<br>cada más de 12 meses                                                                                          | Cada 12 meses <sup>g</sup> |
| <b>¿Se tiene fácil acceso en AP (petición directa) a las siguientes pruebas complementarias para el diagnóstico de HTA?</b> |                                                                                                                                                                                        |                            |
| 12. TC renal                                                                                                                | Cualitativa<br>Sí/ No                                                                                                                                                                  | Sí <sup>b, g</sup>         |
| 13. Ecografía renal                                                                                                         | Cualitativa<br>Sí/ No                                                                                                                                                                  | Sí <sup>b, e, g</sup>      |
| 14. Ecografía cardiaca                                                                                                      | Cualitativa<br>Sí/ No                                                                                                                                                                  | Sí <sup>g</sup>            |
| <b>¿Cómo se realiza el manejo de los pacientes hipertensos diagnosticados y/o tratados?</b>                                 |                                                                                                                                                                                        |                            |
| 15. ¿Se realiza valoración del RCV global de los pacientes?<br>Indique en qué porcentaje                                    | Cualitativa <sup>a</sup><br>Elección:<br>≤25%, 26-50%, 51-75%, >75%                                                                                                                    | >75% <sup>g, h</sup>       |
| 16. ¿Se aplica algún método para evaluar grado de adherencia/cumplimiento terapéutico?<br>Indique en qué porcentaje         | Cualitativa <sup>a</sup><br>Elección:<br>≤25%, 26-50%, 51-75%, >75%                                                                                                                    | >75% <sup>b, g, i</sup>    |
| 16a. En caso de respuesta 16 afirmativa, indicar cuál                                                                       | Cualitativa<br>Elección:<br>Valoración subjetiva por parte del paciente, Test Hyanes Saket, Recuento comprimidos, Consulta de recogida de medicamentos en la receta electrónica, Otros | No aplica                  |
| 17. ¿Qué porcentaje de pacientes tiene en objetivo terapéutico de presión arterial (controlados)?                           | Cualitativa <sup>a</sup><br>Elección:<br>≤30%, 31-60%, >60%                                                                                                                            | >60% <sup>j</sup>          |
| 18. ¿Cuál es el porcentaje de pacientes en tratamiento con 3 o más principios activos y no controlados?                     | Cualitativa <sup>a</sup><br>Elección:<br>≤30%, 31-60%, >60%                                                                                                                            | ≤30% <sup>k</sup>          |
| 19. ¿Se llevan a cabo estrategias específicas para el manejo de la HTA en personas jóvenes (<40 años)?                      | Cualitativa<br>Sí/ No                                                                                                                                                                  | Sí <sup>g, l</sup>         |

<sup>a</sup> Datos medidos o estimados. <sup>b</sup> Mancia G. et al<sup>1</sup>. <sup>c</sup> International Society for Chronobiology et al<sup>2</sup>. <sup>d</sup> O'Brien E. et al<sup>3</sup>. <sup>e</sup> Martínez-Castelao et al<sup>4</sup>. <sup>f</sup> Galcerán JM. et al<sup>5</sup>. <sup>g</sup> Consenso del Comité de Expertos EFIGIE-HTA. <sup>h</sup> Dasgupta K. et al<sup>6</sup>. <sup>i</sup> Márquez Contreras E. Hipertensión; 2008<sup>7</sup>. <sup>j</sup> Llisterri Caro JL. et al. Med Clin; 2012<sup>8</sup>. <sup>k</sup> Llisterri JL. et al. J Hypertens; 2012<sup>9</sup>. <sup>l</sup> Ritchie LD. et al<sup>10</sup>

AP: atención primaria. MAPA: monitorización ambulatoria de la presión arterial. RCV: riesgo cardiovascular. DE: desviación estándar. TC: tomografía computarizada.

**Tabla III. Cuestionario y variables del área de evaluación 3: Aspectos organizativos**

| Pregunta                                                                                                                                                                                                | Tipo de variable y respuesta                                                        | Respuesta control                       |
|---------------------------------------------------------------------------------------------------------------------------------------------------------------------------------------------------------|-------------------------------------------------------------------------------------|-----------------------------------------|
| 1. ¿Cuál es la población asignada que atiende el centro de salud?                                                                                                                                       | Cuantitativa<br>Número                                                              | No aplica                               |
| 2. ¿Cuántos especialistas de Medicina Familiar y Comunitaria hay adscritos al centro de salud?                                                                                                          | Cuantitativa<br>Número                                                              | No aplica                               |
| 3. ¿Cuánto personal de enfermería hay adscrito al centro de salud?                                                                                                                                      | Cuantitativa<br>Número                                                              | No aplica                               |
| 4. ¿Cuál es la proporción de población atendida para cada uno de los médicos del centro de salud?<br>Población atendida: toda la persona que haya sido atendida al menos una vez durante el último año. | Cuantitativa<br>Porcentaje                                                          | No aplica                               |
| 4a. ¿Qué porcentaje de los pacientes de la respuesta 4 es hipertenso?                                                                                                                                   | Cualitativa <sup>a</sup><br>Elección:<br><25%, 25-50%, >50%, sin datos <sup>b</sup> | 25-50% <sup>c, d</sup>                  |
| 5. ¿Se utilizan habitualmente guías clínicas en HTA/RCV en el centro de salud?                                                                                                                          | Cualitativa<br>Sí/ No                                                               | Sí <sup>e, f</sup>                      |
| 5a. En caso de respuesta 5 afirmativa, indique cuál o cuales                                                                                                                                            | Texto                                                                               | -                                       |
| 6. ¿Existe la figura del “médico experto” (consultor/referente) en HTA/RCV en el propio centro?                                                                                                         | Cualitativa<br>Sí/ No                                                               | Sí <sup>g, h</sup>                      |
| 7. ¿El centro tiene una unidad hospitalaria de referencia en HTA/RCV?                                                                                                                                   | Cualitativa<br>Sí/ No                                                               | Sí <sup>i, j</sup>                      |
| 8. ¿Existe una vía abierta y fácil de colaboración/consulta con la AE en HTA/RCV (teléfono, correo, videoconferencia, intranet)?                                                                        | Cualitativa<br>Sí/ No                                                               | Sí <sup>h, k, l, m, n, ñ, o, p, q</sup> |
| 9. ¿Existen alertas en la historia clínica que ayuden a evitar la duplicidad en las determinaciones analíticas?                                                                                         | Cualitativa<br>Sí/ No                                                               | Sí <sup>q</sup>                         |
| 10. ¿Existen elementos de soporte en la historia clínica informatizada para el diagnóstico y el tratamiento de la HTA?                                                                                  | Cualitativa<br>Sí/ No                                                               | Sí <sup>q</sup>                         |
| 11. ¿Existe distribución explícita de tareas entre médico y enfermería en la gestión del paciente hipertenso (protocolos de actuación conjunta)?                                                        | Cualitativa<br>Sí/ No                                                               | Sí <sup>r, s, t, u, v, w</sup>          |
| 12. ¿Existe un programa de coordinación específico con las farmacias comunitarias?                                                                                                                      | Cualitativa<br>Sí/ No                                                               | Sí <sup>y, z</sup>                      |

<sup>a</sup> Datos medidos o estimados. <sup>b</sup> Consenso del Comité de Expertos EFIGIE-HTA. <sup>c</sup> Modesti PA. et al. BMJ Open 2012.<sup>11</sup>; <sup>d</sup> Modesti PA. et al. J Hypertens 2014.<sup>12</sup>; <sup>e</sup> Coca A. et al<sup>13</sup>. <sup>f</sup> Mancía G. et al<sup>1</sup>. <sup>g</sup> Pouchain D. et al<sup>14</sup>. <sup>h</sup> Akbari A. et al<sup>15</sup>. <sup>i</sup> De Luca N. et al<sup>16</sup>. <sup>j</sup> Di Cerbo A. et al<sup>17</sup>. <sup>k</sup> Martell-Claros N. et al<sup>18</sup>. <sup>l</sup> Faulkner A. et al<sup>19</sup>. <sup>m</sup> Passey ME. et al<sup>20</sup>. <sup>n</sup> Haley WE. et al<sup>21</sup>. <sup>ñ</sup> García García M. et al<sup>22</sup>. <sup>o</sup> Alcázar R y Lozano Maneiro G<sup>23</sup>. <sup>p</sup> Scalvini S. et al<sup>24</sup>. <sup>q</sup> Doncelli A. et al<sup>25</sup>. <sup>r</sup> Shojania KG. et al<sup>26</sup>. <sup>s</sup> Carter BL. et al<sup>27</sup>. <sup>t</sup> Walsh JME. et al<sup>28</sup>. <sup>u</sup> Glynn LG. et al<sup>29</sup>. <sup>v</sup> Morak J. et al<sup>30</sup>. <sup>w</sup> Cazanella VJ. et al<sup>31</sup>. <sup>y</sup> Gagnon MP. et al<sup>32</sup>. <sup>z</sup> Grossman JM. et al<sup>33</sup>.  
AE: atención especializada. RCV: riesgo cardiovascular.

**Tabla IV. Cuestionario y variables del área de evaluación 4: Demanda asistencial y consumo de recursos**

| Pregunta                                                                                                                                                                                       | Tipo de variable y respuesta                                                                                                                                              | Respuesta control                     |
|------------------------------------------------------------------------------------------------------------------------------------------------------------------------------------------------|---------------------------------------------------------------------------------------------------------------------------------------------------------------------------|---------------------------------------|
| 1. ¿Los médicos de familia de su centro de salud gestionan su propia agenda? (Entendido como la posibilidad de citar a los pacientes y de decidir el número a citar en la consulta programada) | Cualitativa<br>Sí/ No                                                                                                                                                     | Sí <sup>c</sup>                       |
| 2. En una visita, si se detecta que el paciente necesita dos o más fármacos para uno o más factores de riesgo, ¿se instaura todo el tratamiento en dicha visita?                               | Cualitativa<br>Sí/ No                                                                                                                                                     | Sí <sup>c</sup>                       |
| 3. ¿Cuánto tiempo transcurre desde la prescripción del tratamiento hasta la visita de control para la evaluación del efecto antihipertensivo?                                                  | Cualitativa<br>Elección:<br><3 semanas, 3-6 semanas, 6-8 semanas, >8 semanas                                                                                              | 3-6 semanas <sup>c</sup>              |
| 4. ¿Tiene este centro de salud una actitud proactiva en cribado de la HTA?                                                                                                                     | Cualitativa<br>Sí/ No                                                                                                                                                     | Sí <sup>c</sup>                       |
| 4a. En caso de respuesta 4 afirmativa, indique las iniciativas que se llevan a cabo                                                                                                            | Texto                                                                                                                                                                     | -                                     |
| 5. ¿Quién realiza el seguimiento?: médico y/o personal de enfermería. Elija el porcentaje que más se aproxime a la realidad de su consulta.                                                    | Cualitativa <sup>b</sup><br>Elección:<br>MED: <20%, ENF: >80%<br>MED: 20-40%, ENF: 80-60%<br>MED: 40-60%, ENF: 60-40%<br>MED: 60-80%, ENF: 40-20%<br>MED: >80%, ENF: <20% | MED: 60-80%, ENF: 40-20% <sup>c</sup> |
| 6. ¿Se tiene acceso a los datos de las pruebas obtenidas del estudio en AE (analíticas, imagen, varios) para poder utilizarlos en AP y viceversa?                                              | Cualitativa<br>Sí/ No                                                                                                                                                     | Sí <sup>c</sup>                       |
| 7. ¿Se tiene acceso a los informes emitidos en AE para poder utilizarlos en AP o viceversa?                                                                                                    | Cualitativa<br>Sí/ No                                                                                                                                                     | Sí <sup>c</sup>                       |
| 8. ¿Cuántos días tarda el paciente en acceder al especialista o Unidad de HTA/RCV tras la derivación?                                                                                          | Cualitativa <sup>b</sup><br>Elección:<br><15 días, 15-30 días, 1-2 meses, >2 meses, sin datos                                                                             | <15 días, 15-30 días <sup>c</sup>     |
| 9. Tras una derivación a AE por falta de control de la HTA, ¿quién realiza el seguimiento del paciente?                                                                                        | Cualitativa<br>Elección:<br>Sólo AP, Sólo AE, Compartido                                                                                                                  | Compartido <sup>c</sup>               |
| 9a. En caso de realizar el seguimiento compartido, cuantificar el porcentaje en el que interviene cada profesional sanitario (AP y AE) en porcentaje <sup>a</sup>                              | Cualitativa <sup>b</sup><br>Elección:<br>AE: <20%, AP: >80%<br>AE: 20-40%, AP: 80-60%<br>AE: 40-60%, AP: 60-40%<br>AE: 60-80%, AP: 40-20%<br>AE: >80%, AP: <20%           | AE<20%, AP>80% <sup>c</sup>           |
| 10. ¿Cuál es el promedio anual de visitas que realiza un médico por paciente hipertenso?                                                                                                       | Cualitativa <sup>b</sup><br>Elección:<br>1-3, 4-6, 6-8, >8                                                                                                                | 4-6 visitas <sup>c</sup>              |
| 11. ¿Cuál es el promedio anual de visitas que realiza enfermería por paciente hipertenso?                                                                                                      | Cualitativa <sup>b</sup><br>Elección:<br>1, 2, 3, 4, >4                                                                                                                   | >4 visitas <sup>c</sup>               |
| 12. ¿Cuál es el promedio anual de analíticas que se solicitan por paciente hipertenso?                                                                                                         | Cualitativa <sup>b</sup><br>Elección:<br>1, 2, 3, 4, >4                                                                                                                   | 2 analíticas <sup>c</sup>             |
| 13. ¿Cuál es promedio anual (en porcentaje) de pacientes hipertensos que son derivados a AE?                                                                                                   | Cualitativa <sup>b</sup><br>Elección:<br><10%, 10-20%, 21-30%, >30%                                                                                                       | <10% hipertensos <sup>c</sup>         |

|                                                                                                                                                                               |                                                                           |                              |
|-------------------------------------------------------------------------------------------------------------------------------------------------------------------------------|---------------------------------------------------------------------------|------------------------------|
| 14. ¿Cuál es el promedio (en porcentaje) de pacientes en los últimos 12 meses de su centro de salud/cupo que han acudido a un centro sanitario por una urgencia hipertensiva? | Cualitativa <sup>b</sup><br>Elección:<br><5%, 5-10%, 11-15%, 16-20%, >20% | <5% pacientes <sup>c</sup>   |
| 15. ¿Cuál es el promedio anual (en porcentaje) de pacientes que acuden a visita no concertada por elevación de la presión arterial producida por AINE?                        | Cualitativa <sup>b</sup><br>Elección:<br><5%, 5-10%, 11-15%, 16-20%, >20% | 5-10% pacientes <sup>c</sup> |
| 16. ¿Cuál es el promedio anual de visitas de pacientes con HTA refractaria?                                                                                                   | Cualitativa <sup>b</sup><br>Elección:<br>1, 2, 3, 4, 5, >5                | >5 visitas <sup>c</sup>      |

<sup>a</sup> Sicras et al. Gaceta Sanitaria 2013<sup>34</sup>; <sup>b</sup> Datos medidos o estimados; <sup>c</sup> Consenso del Comité de Expertos EFIGIE-HTA.

MED: médico. ENF: enfermería. RCV: riesgo cardiovascular. AP: atención primaria. AE: atención especializada.

**Tabla V. Cuestionario y variables del área de evaluación 5: Programas de formación continuada para pacientes y profesionales**

| Pregunta                                                                                                                                                                                | Tipo de variable y respuesta | Respuesta control |
|-----------------------------------------------------------------------------------------------------------------------------------------------------------------------------------------|------------------------------|-------------------|
| 1. ¿Se realizan o existen programas y/o talleres de educación sanitaria para pacientes hipertensos/RCV impartidos por el personal de enfermería o con el programa del paciente experto? | Cualitativa<br>Sí/ No        | Sí <sup>a-d</sup> |
| 2. ¿Se realizan o existen sesiones grupales/ talleres sobre medidas higiénico-dietéticas para pacientes hipertensos/RCV?                                                                | Cualitativa<br>Sí/ No        | Sí <sup>a-d</sup> |
| 3. ¿Se realizan o existen sesiones grupales/ talleres sobre dieta para pacientes hipertensos/RCV?                                                                                       | Cualitativa<br>Sí/ No        | Sí <sup>a-d</sup> |
| 4. ¿Se realizan o existen sesiones grupales/ talleres sobre ejercicio físico en pacientes crónicos?                                                                                     | Cualitativa<br>Sí/ No        | Sí <sup>a-d</sup> |
| 5. ¿Se realiza o existe un programa activo de mejora de la adherencia al tratamiento por parte de enfermería?                                                                           | Cualitativa<br>Sí/ No        | Sí <sup>a-d</sup> |
| 6. ¿Se realiza o existe un programa de revisión de la medicación en pacientes polimedicados por parte del farmacéutico de distrito o AP?                                                | Cualitativa<br>Sí/ No        | Sí <sup>a-d</sup> |
| 7. ¿Se realiza o existe una política activa de formación continuada en comunicación médico-paciente?                                                                                    | Cualitativa<br>Sí/ No        | Sí <sup>a-d</sup> |
| 8. ¿Se recomienda al paciente hipertenso de forma activa la búsqueda de información en webs, el uso de APP, etc., que le ayuden a mejorar su patología?                                 | Cualitativa<br>Sí/ No        | Sí <sup>a-d</sup> |
| 9. ¿Se imparte formación a los profesionales sobre HTA/RCV?                                                                                                                             | Cualitativa<br>Sí/ No        | Sí <sup>a-d</sup> |

<sup>a</sup> Fahey T. et al<sup>35</sup>. <sup>b</sup> Mancía G. et al<sup>1</sup>. <sup>c</sup> Márquez Contreras E. et al. Rev Esp Cardiol; 2012<sup>36</sup>. <sup>d</sup> Márquez Contreras E. et al. Aten Primaria; 2009<sup>37</sup>.

RCV: riesgo cardiovascular. AP: atención primaria.

Tabla VI. Variables con resultados medidos o estimados

| Pregunta                                                                                                                                                                      | Datos medidos o estimados          |
|-------------------------------------------------------------------------------------------------------------------------------------------------------------------------------|------------------------------------|
| <b>Área 2: Pruebas diagnósticas y analíticas</b>                                                                                                                              |                                    |
| 2a. En caso de respuesta 2 afirmativa:<br>¿Cuántos registros de MAPA se utilizaron de media en los últimos 12 meses?                                                          | Medidos: 3/19<br>Estimados: 16/19  |
| 2b. En caso de respuesta 2 afirmativa:<br>¿Cuántos pacientes se controlaron mediante MAPA en los últimos 12 meses?                                                            | Medidos: 3/19<br>Estimados: 16/19  |
| 5a. En caso de respuesta 5 afirmativa; ¿con qué frecuencia se solicita (exploración del fondo de ojo)?                                                                        | Medidos: 3/13<br>Estimados: 10/13  |
| 6a. En caso de respuesta 6 afirmativa, ¿con qué frecuencia se solicita (electrocardiograma)?                                                                                  | Medidos: 9/35<br>Estimados: 26/35  |
| 7a. En caso de respuesta afirmativa, ¿con qué frecuencia se solicita (iones)?                                                                                                 | Medidos: 9/35<br>Estimados: 26/35  |
| 8a. En caso de respuesta 8 afirmativa, ¿con qué frecuencia se solicita (creatinina)?                                                                                          | Medidos: 6/35<br>Estimados: 29/35  |
| 9a. En caso de respuesta 9 afirmativa, ¿con qué frecuencia se solicita (albúmina/creatinina)?                                                                                 | Medidos: 8/35<br>Estimados: 27/35  |
| 10a. En caso de respuesta afirmativa, ¿con qué frecuencia se solicita (glucemia)?                                                                                             | Medidos: 8/35<br>Estimados: 27/35  |
| 11a. En caso de respuesta afirmativa; ¿con qué frecuencia se solicita (perfil lipídico)?                                                                                      | Medidos: 8/35<br>Estimados: 27/35  |
| 15. ¿Se realiza valoración del RCV global de los pacientes?<br>Indique en qué porcentaje                                                                                      | Medidos: 9/35<br>Estimados: 26/35  |
| 16. ¿Se aplica algún método para evaluar grado de adherencia/cumplimiento terapéutico?<br>Indique en qué porcentaje                                                           | Medidos: 3/35<br>Estimados: 32/35  |
| 17. ¿Qué porcentaje de pacientes tiene en objetivo terapéutico de presión arterial (controlados)?                                                                             | Medidos: 13/35<br>Estimados: 22/35 |
| 18. ¿Cuál es el porcentaje de pacientes en tratamiento con 3 o más principios activos y no controlados?                                                                       | Medidos: 5/35<br>Estimados: 30/35  |
| <b>Área 2: Aspectos organizativos</b>                                                                                                                                         |                                    |
| 4a. ¿Qué porcentaje de los pacientes de la respuesta 4 es hipertenso?                                                                                                         | Medidos: 7/35<br>Estimados: 28/35  |
| <b>Área 4: Demanda asistencial y consumo de recursos</b>                                                                                                                      |                                    |
| 5. ¿Quién realiza el seguimiento?: médico y/o personal de enfermería. Elija el porcentaje que más se aproxime a la realidad de su consulta.                                   | Medidos: 3/35<br>Estimados: 32/35  |
| 8. ¿Cuántos días tarda el paciente en acceder al especialista o Unidad de HTA/RCV tras la derivación?                                                                         | Medidos: 5/35<br>Estimados: 30/35  |
| 9a. En caso de realizar el seguimiento compartido, cuantificar el porcentaje en el que interviene cada profesional sanitario (AP y AE) en porcentaje <sup>e</sup>             | Medidos: 3/32<br>Estimados: 29/32  |
| 10. ¿Cuál es el promedio anual de visitas que realiza un médico por paciente hipertenso?                                                                                      | Medidos: 4/35<br>Estimados: 31/35  |
| 11. ¿Cuál es el promedio anual de visitas que realiza enfermería por paciente hipertenso?                                                                                     | Medidos: 4/35<br>Estimados: 31/35  |
| 12. ¿Cuál es el promedio anual de analíticas que se solicitan por paciente hipertenso?                                                                                        | Medidos: 6/35<br>Estimados: 29/35  |
| 13. ¿Cuál es promedio anual (en porcentaje) de pacientes hipertensos que son derivados a AE?                                                                                  | Medidos: 3/35<br>Estimados: 32/35  |
| 14. ¿Cuál es el promedio (en porcentaje) de pacientes en los últimos 12 meses de su centro de salud/cupo que han acudido a un centro sanitario por una urgencia hipertensiva? | Medidos: 2/35<br>Estimados: 33/35  |
| 15. ¿Cuál es el promedio anual (en porcentaje) de pacientes que acuden a visita no concertada por elevación de la presión arterial producida por AINE?                        | Medidos: 4/35<br>Estimados: 31/35  |
| 16. ¿Cuál es el promedio anual de visitas de pacientes con HTA refractaria?                                                                                                   | Medidos: 3/35                      |



|  |                  |
|--|------------------|
|  | Estimados: 32/35 |
|--|------------------|

MAPA: monitorización ambulatoria de la presión arterial. RCV: riesgo cardiovascular. AP: atención primaria. AE: atención especializada. AINE: antiinflamatorio no esteroideo.

## Bibliografía

1. Mancia G, Fagard R, Narkiewicz K, Redón J, Zanchetti A, Böhm M, et al. 2013 ESH/ESC Guidelines for the management of arterial hypertension: the Task Force for the management of arterial hypertension of the European Society of Hypertension (ESH) and of the European Society of Cardiology (ESC). *J Hypertens* 2013;**31**:1281-357.
2. International Society for Chronobiology, American Association of Medical Chronobiology and Chronotherapeutics, Spanish Society of Applied Chronobiology, Chronotherapy, and Vascular Risk, Spanish Society of Atherosclerosis, Romanian Society of Internal Medicine, Hermida RC, et al. 2013 ambulatory blood pressure monitoring recommendations for the diagnosis of adult hypertension, assessment of cardiovascular and other hypertension-associated risk, and attainment of therapeutic goals. *Chronobiol Int* 2013;**30**:355-410.
3. O'Brien E, Parati G, Stergiou G, Asmar R, Beilin L, Bilo G, et al. European Society of Hypertension position paper on ambulatory blood pressure monitoring. *J Hypertens* 2013;**31**:1731-68.
4. Martínez-Castelao A, Górriz JL, Bover J, Segura-de la Morena J, Cebollada J, Escalada J, et al. Documento de consenso para la detección y manejo de la enfermedad renal crónica. *Nefrología* 2014;**34**:243-62.
5. Galcerán JM, Felip A, Tovillas X. Documento de consenso sobre atención a la enfermedad renal crónica. *Hipertens Riesgo Vasc* 2013;**30**:107-14.
6. Dasgupta K, Quinn RR, Zarnke KB, Rabi DM, Ravani P, Daskalopoulou SS, et al. The 2014 Canadian Hypertension Education Program Recommendations for Blood Pressure Measurement, Diagnosis, Assessment of Risk, Prevention, and Treatment of Hypertension. *Can J Cardiol* 2014;**30**:485-501.
7. Márquez Contreras E. Evaluación del incumplimiento en la práctica clínica. *Hipertensión* 2008;**25**:205-13.
8. Llisterri Caro JL, Rodríguez Roca GC, Alonso Moreno FJ, Prieto Díaz MA, Banegas Banegas JR, Gonzalez-Segura Alsina D, et al. Control de la presión arterial en la población hipertensa española asistida en Atención Primaria. Estudio PRESCAP 2010. *Med Clínica* 2012;**139**:653-61.
9. Llisterri JL, Rodríguez-Roca GC, Escobar C, Alonso-Moreno FJ, Prieto MA, Barrios V, et al. Treatment and blood pressure control in Spain during 2002-2010. *J Hypertens* 2012;**30**:2425-31.
10. Ritchie LD, Campbell NC, Murchie P. New NICE guidelines for hypertension. *BMJ* 2011;**343**:d5644.
11. Modesti PA, Rapi S, Bamoshmoosh M, Baldereschi M, Massetti L, Padeletti L, et al. Impact of one or two visits strategy on hypertension burden estimation in HYDY, a population-based cross-sectional study: implications for healthcare resource allocation decision making. *BMJ Open* 2012;**2**:e001062.
12. Modesti PA, Agostoni P, Agyemang C, Basu S, Benetos A, Cappuccio FP, et al. Cardiovascular risk assessment in low-resource settings: a consensus document of the European Society of Hypertension Working Group on Hypertension and Cardiovascular Risk in Low Resource Settings. *J Hypertens* 2014;**32**:951-60.
13. Coca A, Aranda P, Bertomeu V, Bonet A, Guillén F, Hernández-Moreno J, et al. Estrategias para un control eficaz de la hipertensión arterial en España. Documento de consenso. *Rev Clínica Esp* 2006;**206**:510-4.
14. Pouchain D, Lièvre M, Huas D, Lebeau J-P, Renard V, Bruckert E, et al. Effects of a multifaceted intervention on cardiovascular risk factors in high-risk hypertensive patients: the ESCAPE trial, a pragmatic cluster randomized trial in general practice. *Trials* 2013;**14**:318.
15. Akbari A, Mayhew A, Al-Alawi MA, Grimshaw J, Winkens R, Glidewell E, et al. Interventions to improve outpatient referrals from primary care to secondary care. *Cochrane Database Syst Rev* 2008;**4**:CD005471.
16. De Luca N, Izzo R, Iaccarino G, Malini PL, Morisco C, Rozza F, et al. The use of a telematic connection for the follow-up of hypertensive patients improves the cardiovascular prognosis. *J Hypertens* 2005;**23**:1417-23.

17. Di Cerbo A, Morales-Medina JC, Palmieri B, Iannitti T. Narrative review of telemedicine consultation in medical practice. *Patient Prefer Adherence* 2015;**9**:65-75.
18. Martell-Claros N, Abad-Cardiel M, Álvarez-Álvarez B, García-Donaire JA, Galgo-Nafría A. Análisis del proceso de derivación del paciente hipertenso en España: Estudio DERIVA | Atención Primaria. *Aten Primaria* 2015;**47**:636-43.
19. Faulkner A, Mills N, Bainton D, Baxter K, Kinnersley P, Peters TJ, et al. A systematic review of the effect of primary care-based service innovations on quality and patterns of referral to specialist secondary care. *Br J Gen Pract J R Coll Gen Pract* 2003;**53**:878-84.
20. Passey ME, Laws RA, Jayasinghe UW, Fanaian M, McKenzie S, Powell-Davies G, et al. Predictors of primary care referrals to a vascular disease prevention lifestyle program among participants in a cluster randomised trial. *BMC Health Serv Res* 2012;**12**:234.
21. Haley WE, Beckrich AL, Sayre J, McNeil R, Fumo P, Rao VM, et al. Improving care coordination between nephrology and primary care: a quality improvement initiative using the renal physicians association toolkit. *Am J Kidney Dis Off J Natl Kidney Found* 2015;**65**:67-79.
22. García García M, Valenzuela Mújica MP, Martínez Ocaña JC, Otero López MS, Ponz Clemente E, López Alba T, et al. Resultados de un programa de coordinación y de información clínica compartida entre nefrología y atención primaria. *Nefrología* 2011;**31**:84-90.
23. Alcázar R, Lozano Maneiro G. Informática: perspectivas de futuro en la coordinación asistencial con Atención Primaria. *Nefrología*. 2006;**26** Suppl 3:109-13.
24. Scalvini S, Rivadossi F, Comini L, Muesan ML, Glisenti F. Telemedicine: the role of specialist second opinion for GPs in the care of hypertensive patients. *Blood Press* 2011;**20**:158-65.
25. Donzelli A, Sghedoni D, Carelli FA, Chirchiglia S, Manunta P. The clinical pathway for hypertensive patient of local health unit, hospitals and general practitioners, the Milan experience. *Rev Recent Clin Trials* 2011;**6**:16-23.
26. Shojania KG, Jennings A, Mayhew A, Ramsay C, Eccles M, Grimshaw J. Effect of point-of-care computer reminders on physician behaviour: a systematic review. *CMAJ Can Med Assoc J J Assoc Medicale Can* 2010;**182**:E216-225.
27. Carter BL, Rogers M, Daly J, Zheng S, James PA. The potency of team-based care interventions for hypertension: a meta-analysis. *Arch Intern Med* 2009;**169**:1748-55.
28. Walsh JME, McDonald KM, Shojania KG, Sundaram V, Nayak S, Lewis R, et al. Quality improvement strategies for hypertension management: a systematic review. *Med Care* 2006;**44**:646-57.
29. Glynn LG, Murphy AW, Smith SM, Schroeder K, Fahey T. Interventions used to improve control of blood pressure in patients with hypertension. *Cochrane Database Syst Rev* 2010;(3):CD005182.
30. Morak J, Kumpusch H, Hayn D, Modre-Osprian R, Schreier G. Design and evaluation of a telemonitoring concept based on NFC-enabled mobile phones and sensor devices. *IEEE Trans Inf Technol Biomed Publ IEEE Eng Med Biol Soc* 2012;**16**:17-23.
31. Canzanello VJ, Jensen PL, Schwartz LL, Worra JB, Klein LK. Improved blood pressure control with a physician-nurse team and home blood pressure measurement. *Mayo Clin Proc* 2005;**80**:31-6.
32. Gagnon M-P, Nsangou É-R, Payne-Gagnon J, Grenier S, Sicotte C. Barriers and facilitators to implementing electronic prescription: a systematic review of user groups' perceptions. *J Am Med Inform Assoc JAMIA* 2014;**21**:535-41.
33. Grossman JM, Cross DA, Boukus ER, Cohen GR. Transmitting and processing electronic prescriptions: experiences of physician practices and pharmacies. *J Am Med Inform Assoc JAMIA* 2012;**19**:353-9.
34. Sicras A, Fernández JL, Santafé L, Prats J, Pérez M. Influencia de la comorbilidad en el control de la hipertensión arterial: estudio de base poblacional. *Gac Sanit* 2013;**27**:32-68.

35. Fahey T, Schroeder K, Ebrahim S. Educational and organisational interventions used to improve the management of hypertension in primary care: a systematic review. *Br J Gen Pract J R Coll Gen Pract* 2005;**55**:875-82.
36. Márquez-Contreras E, de la Figuera-Von Wichmann M, Franch-Nadal J, Llisterri-Caro JL, Gil-Guillén V, Martín-de Pablos JL, et al. ¿Los pacientes con alto riesgo vascular toman correctamente la medicación antihipertensiva? Estudio Cumple-MEMS. *Rev Esp Cardiol* 2012;**65**:544–550.
37. Márquez Contreras E, Martel Claros N, Gil Guillén V, Martín De Pablos JL, De la Figuera Von Wichman M, Casado Martínez JJ, et al. Intervención no farmacológica como estrategia para favorecer el control de la hipertensión arterial y mejorar el cumplimiento antihipertensivo. *Aten Primaria* 2009;**41**:501-10.
